# Supplementary material
Source: Springer Nature journal article supplement (https://www.springermedizin.de/resource/supplementary/12985_2010_934_MOESM2_ESM.pdf/9608772)

Chaliyum  
Beypore  
Olavanna

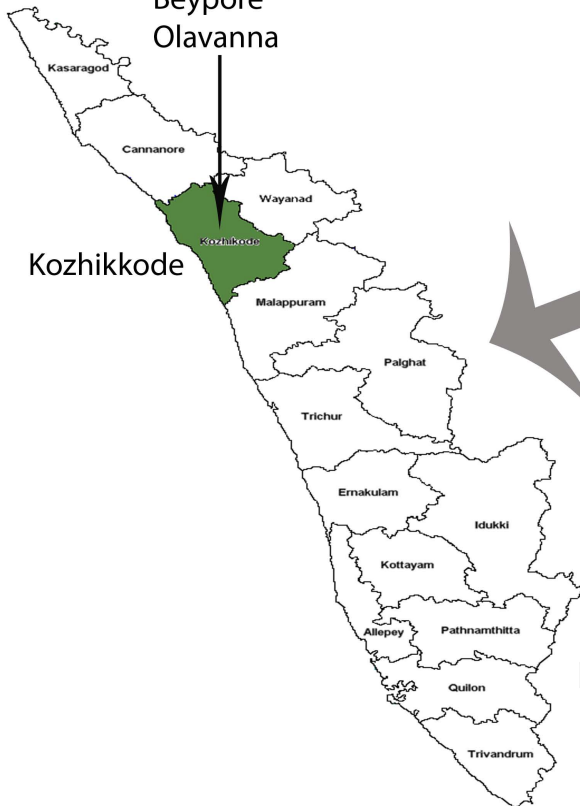

Kozhikkode

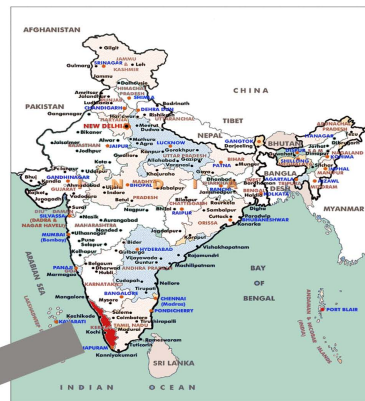

INDIA

KERALA

Supplement: MOESM2 [file 9608772]
